# Supplementary material
Source: PubMed Central journal article supplement (PMC3645319)
Supplement: NIHMS459223-supplement-supplement_1.pdf [file NIHMS459223-supplement-supplement_1.pdf]

794 *Table S1.* Mean percent of trials that subjects chose the stimulus associated with the  
 795 large reward during pretest.

796

---

|                            | <i>Lemur catta</i> |                  | <i>Eulemur mongoz</i> |              | <i>Varecia rubra</i> |
|----------------------------|--------------------|------------------|-----------------------|--------------|----------------------|
| <b>Quantity Comparison</b> | <b>Aracus</b>      | <b>Aristides</b> | <b>Eduardo</b>        | <b>Pedro</b> | <b>Borealis</b>      |
| 1 versus 0                 | 93% *              | 86% *            | 90% *                 | 31%          | 76% *                |
| 2 versus 1                 | 60%                | 98% *            | 63% *                 | 88% *        | 64% *                |

---

797

798 \* Significant preference, one-tailed binomial test

799

800

801

802

803

804

805

806

807

808

809

810

811

812

813

814

815 Table S2. Mean percent of trials that subjects chose the constant option in the last 5  
 816 sessions of each condition.

|                                          | <i>Lemur catta</i> |                  | <i>Eulemur mongoz</i> |              | <i>Varecia rubra</i> |
|------------------------------------------|--------------------|------------------|-----------------------|--------------|----------------------|
| <b>Variable to Constant Reward Ratio</b> | <b>Aracus</b>      | <b>Aristides</b> | <b>Eduardo</b>        | <b>Pedro</b> | <b>Borealis</b>      |
| 1                                        | 65*                | 97*              | 58                    | 83*          | 68*                  |
| 1.5                                      | 60                 | 93 *             | 65*                   | 87*          | -                    |
| 2                                        | 67*                | 92*              | 60                    | 88*          | 48                   |
| 2.5                                      | 57                 | 47               | 62                    | 67*          | -                    |
| 3                                        | 32 <sup>+</sup>    | 62               | 63*                   | 55           | 50                   |
| 3.5                                      | 58                 | 3 <sup>+</sup>   | 67*                   | 47           | -                    |
| 4                                        | 47                 | 82*              | 65*                   | 40           | 63*                  |
| 4.5                                      | 47                 | 93*              | 58                    | 82*          | -                    |
| 5                                        | 2 <sup>+</sup>     | 10 <sup>+</sup>  | 72*                   | 98*          | 54                   |
| 7.5                                      | 48                 | 20 <sup>+</sup>  | 43                    | 50           | 37 <sup>+</sup>      |

817

818 \* Significant preference for constant option, binomial test

819 + Significant preference for variable option, binomial test

820

821
